# Supplementary material
Source: ML conference proceedings conference paper supplement (https://aclanthology.org/D17-1034)
Supplement: Attachment [file emnlp17-muse-camera_appendix.pdf › emnlp17-muse-camera_appendix.pdf]

## A Doubly Stochastic Gradient

To derive doubly stochastic gradient for equation (5), we first denote (5) as  $J(\Theta)$  with  $\Theta = \{P, Q\}$  and resolve the expectation form as:

$$\begin{aligned} J(\theta) &= \mathbb{E}_{z_{ik} \sim \pi(\cdot | \bar{C}_t)} [\log \bar{\mathcal{L}}(z_{jl} | z_{ik})] \\ &= \sum_k \pi(z_{ik} | \bar{C}_t) \log \bar{\mathcal{L}}(z_{jl} | z_{ik}). \end{aligned}$$

Denote  $\Theta = \{P, Q\}$  as the parameter set for policy  $\pi$ . The gradient with respect to  $\Theta$  should be:

$$\begin{aligned} \frac{\partial J(\theta)}{\partial \Theta} &= \frac{\partial}{\partial \Theta} \sum_k \pi(z_{ik} | \bar{C}_t) \log \bar{\mathcal{L}}(z_{jl} | z_{ik}) \\ &= \sum_k \log \bar{\mathcal{L}}(z_{jl} | z_{ik}) \frac{\partial \pi(z_{ik} | \bar{C}_t)}{\partial \Theta} \\ &= \sum_k \log \bar{\mathcal{L}}(z_{jl} | z_{ik}) \left( \frac{\partial \log \pi(z_{ik} | \bar{C}_t)}{\partial \Theta} \right) (\pi(z_{ik} | \bar{C}_t)) \\ &= \mathbb{E}_{z_{ik} \sim \pi(\cdot | \bar{C}_t)} [\log \bar{\mathcal{L}}(z_{jl} | z_{ik}) \frac{\partial \log \pi(z_{ik} | \bar{C}_t)}{\partial \Theta}] \end{aligned}$$

Accordingly, if we conduct typical stochastic gradient ascent training on  $J(\Theta)$  with respect to  $\Theta$  from samples  $z_{ik}$  with a learning rate  $\eta$ , the update formula will be:

$$\Theta = \Theta + \eta \log \bar{\mathcal{L}}(z_{jl} | z_{ik}) \frac{\partial \log \pi(z_{ik} | \bar{C}_t)}{\partial \Theta}.$$

However, the collocation log likelihood should always be non-positive:  $\log \bar{\mathcal{L}}(z_{jl} | z_{ik}) \leq 0$ . Therefore, as long as the collocation log likelihood  $\log \bar{\mathcal{L}}(z_{jl} | z_{ik})$  is negative, the update formula is to minimize the likelihood of choosing  $z_{ik}$ , despite the fact that  $z_{ik}$  may be good choices. On the other hand, if the log likelihood reaches 0, according to (4), it indicates:

$$\begin{aligned} \log \bar{\mathcal{L}}(z_{jl} | z_{ik}) = 0 &\Rightarrow \bar{\mathcal{L}}(z_{jl} | z_{ik}) = 1 \\ \Rightarrow U_{z_{ik}}^T V_{z_{jl}} &\rightarrow \infty, \quad U_{z_{ik}}^T V_{z_{uv}} \rightarrow \infty, \quad \forall z_{uv}, \end{aligned}$$

which leads to computational overflow from an infinity value.
